# Supplementary material for: Implementation of Virtual Communities of Practice in Healthcare to Improve Capability and Capacity: A 10-Year Scoping Review
Source: MDPI journal article supplement (doi:10.3390/ijerph19137994), 2022-06-29
Supplement: s1 [file s1]

**Table S1:** Table of characteristics for review papers

|   | <i>Lead Author,<br/>year (country<br/>published)</i>                        | <i>Review<br/>type</i>              | <i>Studies<br/>reviewed</i>                           | <i>Context</i>                             | <i>Aim</i>                                                                                                                                                                     | <i>Outcome measures</i>                                                                                                                                     | <i>Key findings</i>                                                                                                                                                                                                                                                                                                                                                                                                                                                                                                                                                                                               |
|---|-----------------------------------------------------------------------------|-------------------------------------|-------------------------------------------------------|--------------------------------------------|--------------------------------------------------------------------------------------------------------------------------------------------------------------------------------|-------------------------------------------------------------------------------------------------------------------------------------------------------------|-------------------------------------------------------------------------------------------------------------------------------------------------------------------------------------------------------------------------------------------------------------------------------------------------------------------------------------------------------------------------------------------------------------------------------------------------------------------------------------------------------------------------------------------------------------------------------------------------------------------|
| 1 | Adedoyin,<br>2016<br>(United States)                                        | Rapid<br>Review                     | 10                                                    | Social work                                | To examine the literature<br>for studies on VCoP's in<br>social work                                                                                                           | Digital tool used,<br>outcomes,<br>environment, design                                                                                                      | -Online tools are being used more frequently in social work.<br>-Students accept more readily than lecturers and supervisors<br>-Cautious of privacy and ethical issues<br>-Best practice and continued learning through online platforms should be encouraged.                                                                                                                                                                                                                                                                                                                                                   |
| 2 | Barnett et al,<br>2012<br>(Australia)                                       | Literature<br>Review                | 22                                                    | GP training                                | To explore if there is any<br>evidence of VCoPs for GP<br>training + to identify<br>evidence-based guidelines<br>for developing a VCoP                                         | Support or negative<br>count in the literature<br>for 6 key themes for<br>developing a VCoP                                                                 | No studies specific for GP training.<br><br>6 key themes for developing a VCoP (Probst and Borzillo) and support or negative count from<br>the literature: Leadership (support:18, negative: 4), Objectives (support:15, negative:3),<br>Sponsorship (support:12, negative: 0), Boundary Spanning (support: 12, negative:3), Risk-free<br>environment (support: 6, negative:2) and measurements (support:6, negative:0).<br>Two additional themes from the authors: technology (support:16, negative:7), community<br>(support: 19, negative:2)<br>Further research is needed to validate the proposed framework. |
| 3 | Mc Loughlin<br>et al, 2018<br>(Ireland and<br>United<br>Kingdom)            | Integrated<br>Review                | 19 articles                                           | Health and<br>social care<br>professionals | To find uses for<br>supporting<br>interprofessional<br>education (IPE) and<br>interprofessional<br>collaboration (IPC)<br>activities and determine<br>strengths and weaknesses | Definitions and<br>approaches<br>technological<br>infrastructure<br>reported benefits<br>participation issues<br>trust and privacy and<br>technical ability | "..there is some evidence that VCoPs can offer an informal method of professional and<br>interprofessional development for clinicians, and can decrease social and professional isolation.<br>However, for VCoPs to be successful, issues of privacy, trust, encouragement and technology<br>need to be addressed"                                                                                                                                                                                                                                                                                                |
| 4 | Ranmuthugala<br>et al, 2011<br>(Australia)                                  | Systematic<br>Review                | 31<br>primary<br>research, 2<br>systematic<br>reviews | Healthcare                                 | Review of how/why<br>VCOP's are developed<br>and if they assist in<br>healthcare                                                                                               | Composition and<br>purpose of CoP's in<br>healthcare, means of<br>interaction, methods<br>of knowledge<br>exchange, improving<br>healthcare<br>performance  | -UK most common country of origin<br>-most of the CoPs described included more than one profession/organisation<br>- difficult to compare communication methods due to differences in reporting<br>-16/31 studies reported meeting face-to-face at least once<br>-24/31 used qualitative methods<br>-most studies used data from a single approach to gather data (e.g., interviews or observations)<br>-Require a flexible framework aiming to "guide" rather than "prescribe"                                                                                                                                   |
| 5 | Rolls et al,<br>2016<br>(Australia,<br>United<br>Kingdom,<br>United States) | Integrative<br>literature<br>review | 72                                                    | Healthcare<br>professionals                | Review the use of social<br>media by healthcare<br>workers.                                                                                                                    | Research methods and<br>study quality, use of<br>social media by health<br>care professionals,<br>Web-based posting<br>behaviours and                       | -Evaluation of 3 studies suggests that social media use is mediated by a positive attitude and<br>accessibility<br>-Most commonly established to create a forum where relevant specialty knowledge and<br>professional issues could be shared/discussed (n=17).<br>-More frequent reading/accessing behaviour, low posting behaviours by most                                                                                                                                                                                                                                                                     |

mediating factors of  
Web-based posting

- The most common Web-based activity was request for/supply of specialty-specific clinical information. Facilitated by a Web-based culture of collectivism, reciprocity, and a respectful non-competitive environment.
- Findings suggest that healthcare professionals view virtual communities as enabling them to make more informed practice decisions
- Tribal behaviours may limit knowledge sharing
- Further research required to assess if it improves patient outcomes
