# Supplementary material for: Implementation of Virtual Communities of Practice in Healthcare to Improve Capability and Capacity: A 10-Year Scoping Review
Source: MDPI journal article supplement (doi:10.3390/ijerph19137994), 2022-06-29
Supplement: s1 [file s1]

**Table S2.** Table of study characteristics case reports

|   | <i>Lead Author, year (Country)</i>  | <i>Context</i>             | <i>Health professionals involved</i> | <i>Size of the network</i> | <i>Technological Infrastructure</i> | <i>Aim</i>                                                                                                       | <i>Outcome measures</i>                                                                                                                                                                                                                                                                                                                                                                                                   | <i>Key findings</i>                                                                                                                                                                                                                                                                                                                                                                                                                                                                                          |
|---|-------------------------------------|----------------------------|--------------------------------------|----------------------------|-------------------------------------|------------------------------------------------------------------------------------------------------------------|---------------------------------------------------------------------------------------------------------------------------------------------------------------------------------------------------------------------------------------------------------------------------------------------------------------------------------------------------------------------------------------------------------------------------|--------------------------------------------------------------------------------------------------------------------------------------------------------------------------------------------------------------------------------------------------------------------------------------------------------------------------------------------------------------------------------------------------------------------------------------------------------------------------------------------------------------|
| 1 | Abos Mendizabal et al, 2013 (Spain) | Primary Care               | Primary care professionals           | 1627 registered            | IdeaScale Software                  | To assess development, implementation, take-up, participation, use and opinions of a VCoP                        | Use of the VCoP                                                                                                                                                                                                                                                                                                                                                                                                           | -Satisfactory participation and acceptance (90 actively participated)<br>-Confirms framework by Probst and Borzillo that essential criteria are leaders and facilitators, a wide base of potential participants, clear objectives, trust, a user-friendly platform, transparency and feedback about ideas<br>Facilitator role: coordinates 3 support groups, ideas innovation and management to ensure progress of ideas<br>New initiatives + increase role of health professionals to ensure sustainability |
| 2 | Alary Gauvreau et al, 2019 (Canada) | Aphasia Rehabilitation     | Speech language pathologists         | 13                         | Adobe Connect                       | Describe and evaluate VCoP for aphasia rehabilitation                                                            | Logbooks and observation: logic and thematic analysis<br>5 educational aims: 1. knowledge acquisition 2. social interaction 3. knowledge sharing; 4. knowledge creation; 5. identity building”<br><br>“Level of participant engagement, the material shared and created by participants, the factors influencing the participants’ appreciation of the activities of the CoP, and the impacts of participant engagement”. | Resulted in more participation than anticipated.<br>Positive: All participants found the VCoP taught them about clinical tools & most reflected on their practice.<br>Negative: developed by researchers and therefore not driven by member needs (although positive results show it did address some member needs)                                                                                                                                                                                          |
| 3 | Coleman, 2012 (South Africa)        | Doctors in rural hospitals | Doctors                              | 10                         | N/A                                 | Assess how knowledge is disseminated, to propose a VCoP framework for rural doctors to share with urban doctors. | Semi-structured open - ended interviews about ICT Infrastructure availability, doctors’ workload, methods and frequency of consultation, task type and satisfaction of using a computer-mediated tool                                                                                                                                                                                                                     | New VCoP framework that is based on the following: responsibility, connectedness and reverence to support doctors in rural hospitals                                                                                                                                                                                                                                                                                                                                                                         |

|   |                                     |                |                                                                                                                                                                                |                                                                                                                                      |                                                                                      |                                                                                                                                                                                                      |                                                                                                                                                                                                                                                                                                                                                    |                                                                                                                                                                                                                                                                                                                                                                                                                                               |
|---|-------------------------------------|----------------|--------------------------------------------------------------------------------------------------------------------------------------------------------------------------------|--------------------------------------------------------------------------------------------------------------------------------------|--------------------------------------------------------------------------------------|------------------------------------------------------------------------------------------------------------------------------------------------------------------------------------------------------|----------------------------------------------------------------------------------------------------------------------------------------------------------------------------------------------------------------------------------------------------------------------------------------------------------------------------------------------------|-----------------------------------------------------------------------------------------------------------------------------------------------------------------------------------------------------------------------------------------------------------------------------------------------------------------------------------------------------------------------------------------------------------------------------------------------|
| 4 | Farrell et al, 2014 (United States) | Cancer Control | Cancer researchers and practitioners                                                                                                                                           | “As of 2013 R2R had more than 1700 registered members”                                                                               | Web-based dissemination program (P.L.A.N.E.T)                                        | Describe how a VCoP for cancer control research can be put together and how it can help                                                                                                              | Average comments generated in response to different discussion types, R2F NCI: Professional development, personal stories, soliciting of general response, posting of information or resources, self-promotion, or other promotion, sharing experiences, soliciting of information<br>Note: R2R used contact us feature and regular member surveys | -The most common cancer-issue posts were about: communication, dissemination and project implementation.<br>-Members most likely to respond when colleagues asking questions<br>-R2R used 3 main concepts: activity, content, interaction.<br>-Further evaluation required                                                                                                                                                                    |
| 5 | Landes et al, 2019 (United States)  | Psychotherapy  | Department of Veteran Affairs, Dialectical Behaviour Therapy                                                                                                                   | “In the first 30 days, the site had 1,334 unique users. In the following months, it had between 24 and 684 unique users per 30 days” | Sharepoint web application developed by Microsoft                                    | To describe the creation of a VCoP to support veteran affair providers to implement dialectical behaviour therapy (DBT) and therefore to assist other groups in implementing evidence-based therapy. | Web analytics                                                                                                                                                                                                                                                                                                                                      | -Linked providers nationally and enabled discussions and a space to share information and resources.<br>-Also provided a link to other providers that use DBT.<br>-The VCoP met all the 7 characteristics of a VCoP:“ facilitation, champion and support, objectives and goals, a broad church, supportive environment, measurement and feedback, technology and community” (Barnett et al)<br>-Involvement of technology and content experts |
| 6 | Lewis et al, 2018 (United States)   | Dermatology    | Two general dermatologists, two pediatric dermatologists, a dermatopathologist, a clinical psychologist and an advanced practice nurse meet with primary care providers (PCPs) | 7 providers meet with 7-15 PCPs once per week.                                                                                       | Dermatology ECHO (Zoom) and ECHO tele Missouri Dermatology Image database mobile app | To demonstrate the dermatology ECHO approach via live interactive video technologies                                                                                                                 | Diagnosis of the case presentation and demonstration of the uses of dermatology ECHO                                                                                                                                                                                                                                                               | -An example of the benefits of dermatology ECHO<br>-Engages multidisciplinary team<br>-Reaches patients that would otherwise not get the care they require<br>-ECHO discussion of specific patient that resulted in improvement of condition<br>-Other sites also gained from the discussion                                                                                                                                                  |

|   |                                      |                                                                    |                                           |                                                                                                                                                                                                                                                                                                        |                                                                                                                                                                       |                                                                                                                                                                                   |                                                                                                     |                                                                                                                                                                                                                                                                                                                                                                                                  |
|---|--------------------------------------|--------------------------------------------------------------------|-------------------------------------------|--------------------------------------------------------------------------------------------------------------------------------------------------------------------------------------------------------------------------------------------------------------------------------------------------------|-----------------------------------------------------------------------------------------------------------------------------------------------------------------------|-----------------------------------------------------------------------------------------------------------------------------------------------------------------------------------|-----------------------------------------------------------------------------------------------------|--------------------------------------------------------------------------------------------------------------------------------------------------------------------------------------------------------------------------------------------------------------------------------------------------------------------------------------------------------------------------------------------------|
| 7 | Murad et al, 2019 (Australia)        | General Practitioners                                              | Practicing GPs                            | 7 continued for full course                                                                                                                                                                                                                                                                            | The CFC Learning Hub<br><br>("The CFC Learning Hub is a secure, Web-based prototype HVCoP website, created using the Igloo Web-based social media software platform") | Development, description, and evaluation (particularly of method of testing engagement features) of an online case-based learning hub to help GP's understanding of osteoporosis. | Measurement of sessions and engagement (passive or active)                                          | Key features:<br>-material was focused on clinical cases<br>-learning activities were interactive<br>-GPs were interested in practice-based web-based learning.<br>-GPs were more interested in topics regarding clinical application<br>Topics that were most engaging were: "about osteoporosis" and "prevention" were the most engaging topics and "shared decision making" was least active. |
| 8 | Sims, 2018 (United Kingdom)          | Medical support for expeditions and people in extreme environments | Specialised medicine doctors              | States 'over 500 members'                                                                                                                                                                                                                                                                              | Website, email and blog.                                                                                                                                              | Not specifically stated. 'The case study community is designed ot address the complex needs of communication, knowledge sharing and social inclusion'.                            | Researcher developed questionnaire with open questions built around themes derived from literature. | -services provided (website, email, blog) led to the development of a community.<br>-there is social cohesion and collaboration.<br>-the community has a distinct identity.<br>-the community facilitates greater effectiveness, quality and consistency of practice.<br>-members acquired, shared and retained knowledge.                                                                       |
| 9 | Ting et al, 2018 (Canada)            | Emergency Medicine                                                 | Canadian Emergency Medicine practitioners | N people not stated. 'From the website launch (January 1, 2016) through September 23, 2018, CanadiEM received > 2.5 million page views (now averaging > 120,000 page views/month). CRACKCast podcasts downloaded > 750,000 times (>35,000 downloads/month). Website viewers hailed from 217 countries. | CanadiEM (2 websites and a podcast)                                                                                                                                   | To develop a VCoP for collaboration, learning and knowledge dissemination                                                                                                         | Website content & audience, education scholarship                                                   | Successful in developing a platform for knowledge dissemination<br>Had more than 2.5 million page views from 217 countries. Podcast downloaded 750 000 times. 782 published articles of which 71 underwent coached peer review process.<br>- Identity developed that values national collaboration on high-quality scholarship.                                                                  |
| 9 | Wolbrink et al, 2017 (United States) | Pediatric critical care                                            | Critical care clinicians                  | "OPENPediatrics has acquired over 7,443 registered users from over 1,800 hospitals in                                                                                                                                                                                                                  | OPENPediatrics6 (online social learning platform)                                                                                                                     | To describe and evaluate the online paediatric critical care CoP                                                                                                                  | Web-based surveys and site analytics                                                                | "From March 2013–November 2015, 28 WSPs [world shared practice videos] were launched on a variety of topics. They were viewed over 18,414 times by 1,864 viewers in 132 countries and 760 hospitals; 1,155 comments were                                                                                                                                                                         |

|                                    |                                               |                                                                                                                                                                                                                                                                                                                                 |
|------------------------------------|-----------------------------------------------|---------------------------------------------------------------------------------------------------------------------------------------------------------------------------------------------------------------------------------------------------------------------------------------------------------------------------------|
| 132 countries as of November 2015" | (through face-to-face conferences and online) | submitted. Attending physicians/consultants were the largest audience (36% [671/1,864]), and 37% (30/81) of responding viewers that commented in WSPs watched in small groups. The WSP series was reported to add value to respondents' learning or teaching and to have had a positive impact on their knowledge or practice." |
|------------------------------------|-----------------------------------------------|---------------------------------------------------------------------------------------------------------------------------------------------------------------------------------------------------------------------------------------------------------------------------------------------------------------------------------|
