# Supplementary material for: Implementation of Virtual Communities of Practice in Healthcare to Improve Capability and Capacity: A 10-Year Scoping Review
Source: Int J Environ Res Public Health. 2022 Jun 29;19(13):7994. doi: 10.3390/ijerph19137994 (PMC9265616; doi:10.3390/ijerph19137994)
Supplement: Supplementary file 1 [file ijerph-19-07994-s001.zip]

Archive with 6 entries (6 files):
- Table S1_Table of study characteristics_reviews.pdf
- Table S2_Table of study characteristics_case reports.pdf
- Table S3_Table of Study characteristics_Other types of study.pdf
- Table S4. Table of VCoP processes.pdf
- Table S5_Table of VCoP roles.pdf
- Table S6. PRISMA-ScR-Fillable-Checklist_.pdf
